# Supplementary material for: Assessing L. donovani Skin Parasite Load: A Proof of Concept Study of a Microbiopsy Device in an Indian Setting
Source: PubMed Central journal article supplement (PMC8006290; doi:10.3389/fcimb.2021.645121), 2021-03-11
Supplement: DataSheet_1.pdf [file DataSheet_1.pdf]

## SUPPLEMENTARY MATERIALS

**Supplementary Figure 1** : Boxplot of the parasite load ( $\log_{10}(\text{PGE}/\text{MB}+1)$ ) per disease status, using the **mean** of all samples taken from an individual. The body of the boxplot represents the median and IQR; whiskers reach 1.5x IQR. MB = Microbiopsy device. PGE = Parasite Genome Equivalent. IQR = Interquartile Range. The red dotted line represents the cut-off value to identify positive skin samples. The black dotted line defines the lower limit of the linear dynamic range (values above zero but below this line cannot be quantified).

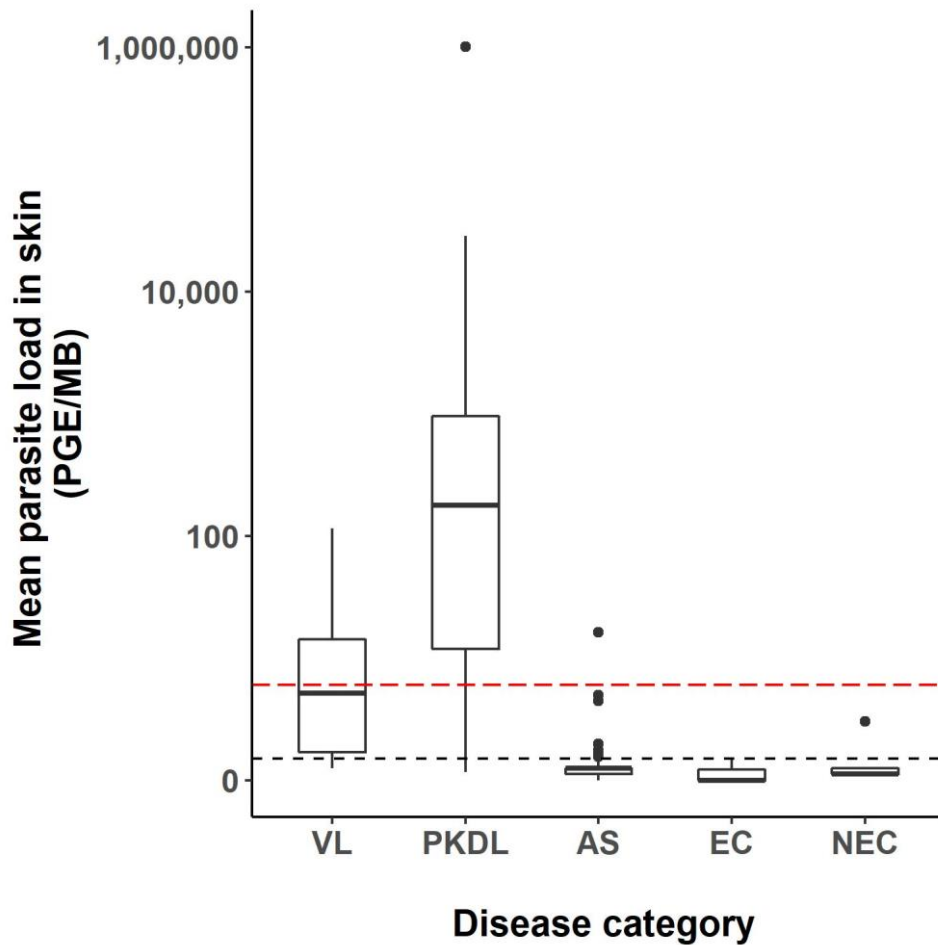

**Supplementary Figure 2** : Boxplot of the parasite load ( $\log_{10}(\text{PGE}/\text{MB}+1)$ ) per disease status, using only the skin sample with the **highest** parasite load. The body of the boxplot represents the median and IQR; whiskers reach 1.5x IQR. MB = Microbiopsy device. PGE = Parasite Genome Equivalent. IQR = Interquartile Range. The red dotted line represents the cut-off value to identify positive skin samples. The black dotted line defines the lower limit of the linear dynamic range (values above zero but below this line cannot be quantified).

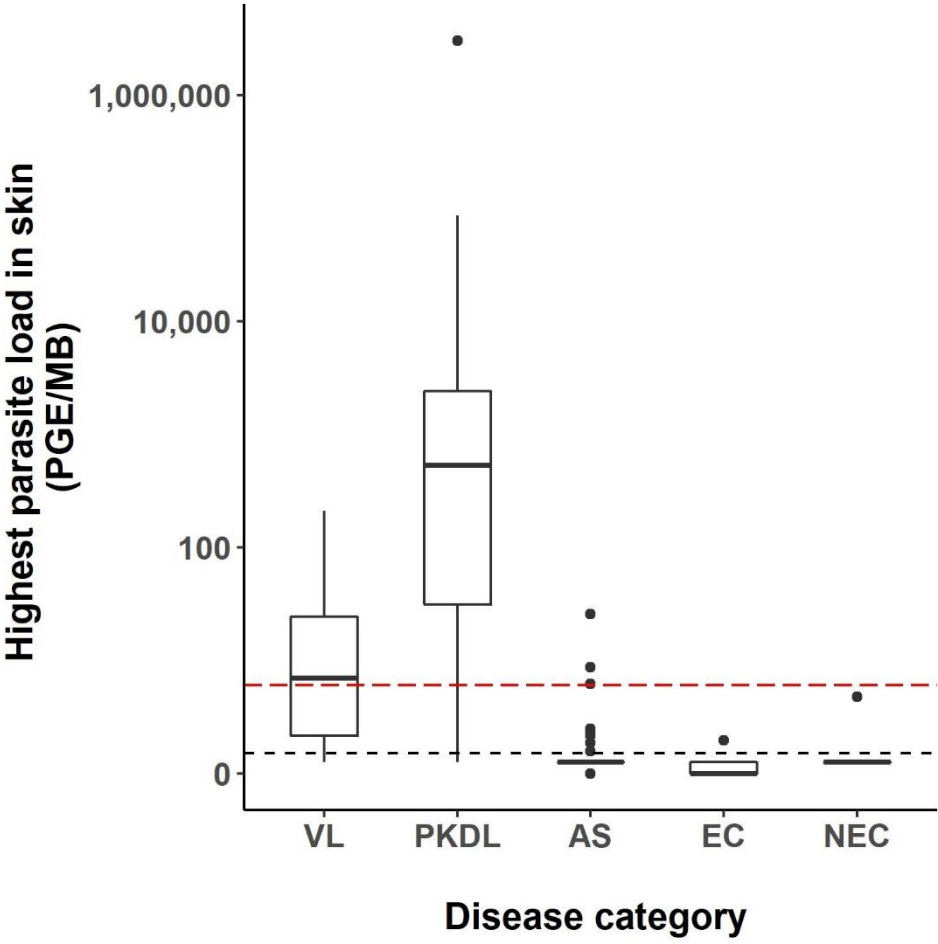

**Supplementary Figure 3:** Scatter plot of the **mean** skin parasite load ( $\log_{10}(\text{PGE}/\text{sample} + 1)$ ) versus blood parasite load ( $\log_{10}(\text{PGE}/\text{ml blood} + 1)$ ) per sampling site. The red dotted line represents the cut-off value used to identify positive samples. The red dotted line represents the cut-off value used to identify positive samples. Empty dots represent values that were not quantifiable (outside of the linear dynamic range of the standard curve).

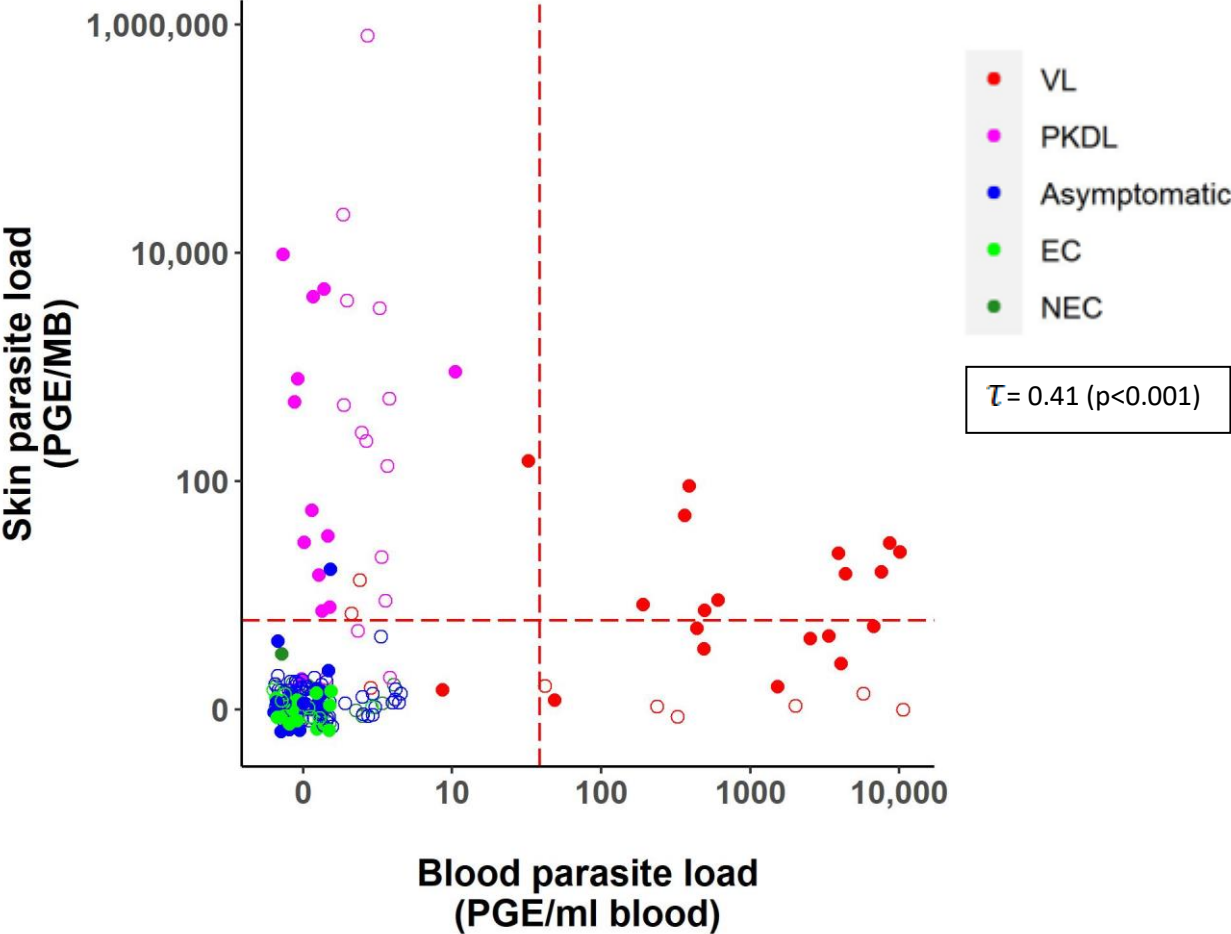

**Supplementary Figure 4:** Scatter plot of the **highest** skin parasite load ( $\log_{10}(\text{PGE}/\text{sample} + 1)$ ) versus blood parasite load ( $\log_{10}(\text{PGE}/\text{ml blood} + 1)$ ) per sampling site. The red dotted line represents the cut-off value used to identify positive samples. The red dotted line represents the cut-off value used to identify positive samples. Empty dots represent values that were not quantifiable (outside of the linear dynamic range of the standard curve).

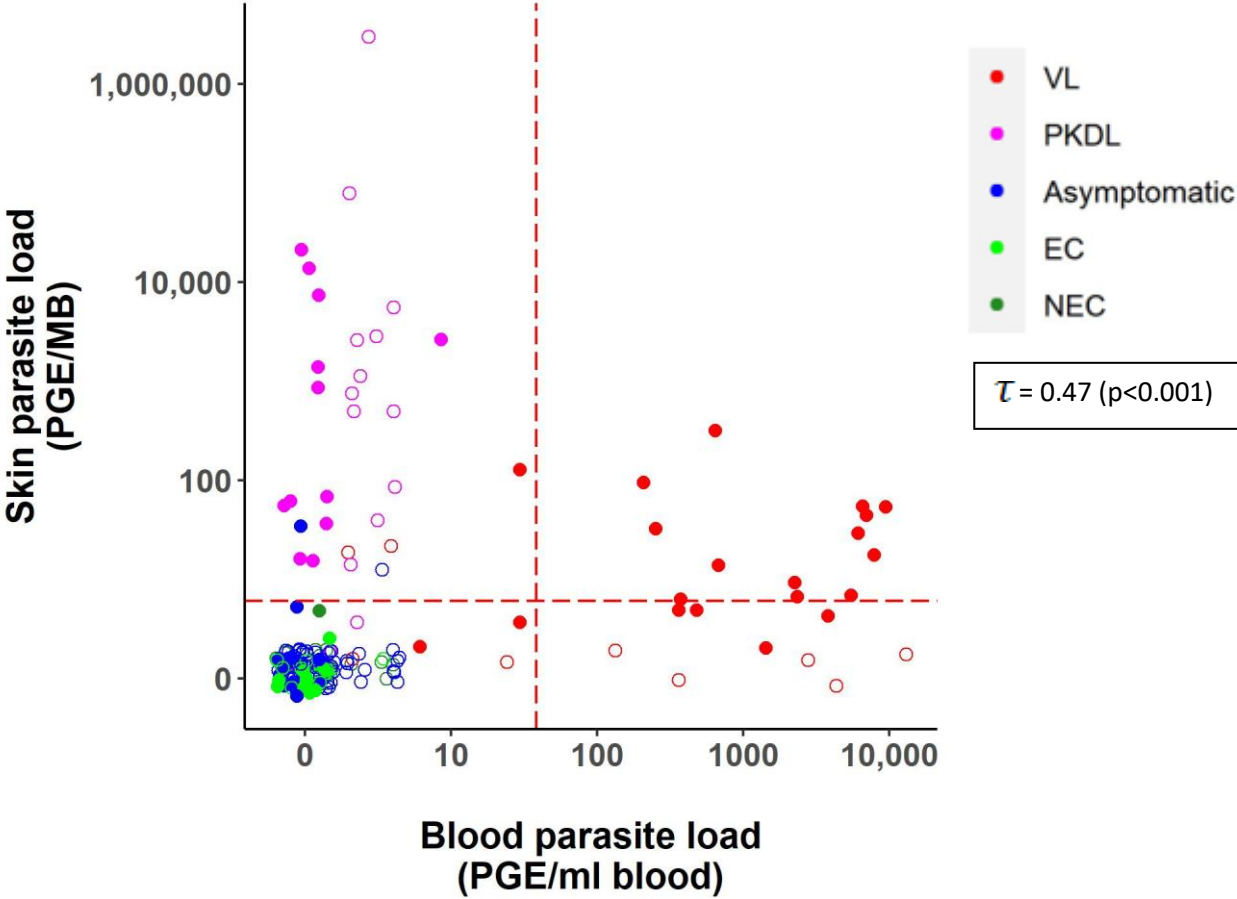

**Supplementary Table 1:** Characteristics of asymptotically infected individuals with at least one positive skin sample. Positive results are marked in bold.

| Age (years) | Sex    | DAT titer        | Elisa (PP value) | Quantiferon (pg/ml) | qPCR Blood (PGE/ml) | qPCR Arm (PGE/MB) | qPCR Neck (PGE/MB) |
|-------------|--------|------------------|------------------|---------------------|---------------------|-------------------|--------------------|
| 26          | Female | <b>≥ 1:3,200</b> | <b>32.73</b>     | <b>59.47</b>        | negative            | <b>5.85</b>       | <b>24.60</b>       |
| 60          | Female | ≥ 1:400          | <b>26.91</b>     | <b>565.26</b>       | <3.75               | <0.50             | <b>7.67</b>        |
| 55          | Female | ≥ 1:800          | <b>27.92</b>     | 36.55               | negative            | <b>5.16</b>       | 1.76               |

*MB : Microbiopsy device. PGE = Parasite Genome Equivalent. DAT = Direct Agglutination Test. PP = percentage point positivity.*
